# Supplementary material
Source: Springer Nature journal article supplement (https://www.springerprofessional.de/resource/supplementary/13638_2012_544_MOESM18_ESM.pdf/11898030)

Average Duration of Fade

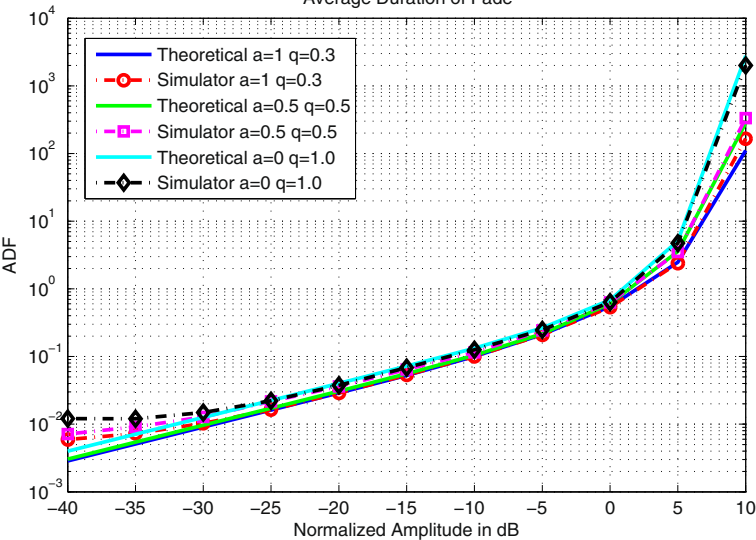

Supplement: MOESM18 [file 11898030]
